# Supplementary material for: Novel LOX Variants in Five Families with Aortic/Arterial Aneurysm and Dissection with Variable Connective Tissue Findings
Source: MDPI journal article supplement (doi:10.3390/ijms22137111), 2021-07-01
Supplement: s1 [file s1]

Table S1: Clinical features overview LOX patients

|                             | Family 1 p.(Leu18Profs*111)                                                                 |                             |                                |                                                                     |                                                   |                    |                    | Family 2 p.(Arg118Glyfs*119)                                                   |                                                         |                                                       | Family 3 p.(Gly149*)                                |                                           |                                                      |                                 | Family 4<br>p.(Met298Arg)                 | Family 5<br>p.(Leu306Pro)                                     |
|-----------------------------|---------------------------------------------------------------------------------------------|-----------------------------|--------------------------------|---------------------------------------------------------------------|---------------------------------------------------|--------------------|--------------------|--------------------------------------------------------------------------------|---------------------------------------------------------|-------------------------------------------------------|-----------------------------------------------------|-------------------------------------------|------------------------------------------------------|---------------------------------|-------------------------------------------|---------------------------------------------------------------|
| Individual                  | II:2                                                                                        | II:3                        | III:4                          | III:6                                                               | III:10                                            | IV:1               | IV:7               | III:1                                                                          | II:1                                                    | I:1                                                   | II:4                                                | II:5                                      | III:1                                                | II:1                            | II:1                                      | III:1                                                         |
| Gender                      | M                                                                                           | M                           | M                              | M                                                                   | M                                                 | M                  | F                  | M                                                                              | M                                                       | M                                                     | M                                                   | M                                         | F                                                    | M                               | F                                         | M                                                             |
| Age (years)                 | 60                                                                                          | 50                          | 43                             | 45                                                                  | 43                                                | 25                 | 16                 | 40                                                                             | 53                                                      | 66                                                    | 56                                                  | 53                                        | 28                                                   | 59                              | 50                                        | 21                                                            |
| Arterial anomalies          | Bental surgery<br>age 60 after<br>dissection, died<br>73 due to<br>myocardial<br>infarction | Sudden<br>death<br>(age 50) | Type A<br>dissection<br>(53mm) | Aortic<br>dissection<br>(age 45-<br>84mm) and<br>Bentall<br>surgery | Aortic<br>sinus<br>diameter<br>(43mm -<br>age 43) | Normal<br>diameter | Normal<br>diameter | Type A<br>dissection at age<br>of 19 (underwent<br>composite graft<br>surgery) | Discrete mitral<br>and aortic<br>valve<br>insufficiency |                                                       | Borderline<br>aortic sinus<br>(41mm)                | Mild valve<br>regurgitation               |                                                      |                                 | Left carotid<br>dissection (age<br>46)    | Dilatation of<br>aorta sinus and<br>ascendens (age<br>6)      |
|                             |                                                                                             |                             |                                |                                                                     |                                                   |                    |                    |                                                                                |                                                         |                                                       |                                                     |                                           |                                                      |                                 | Coronary artery<br>dissection (age<br>44) | Elective<br>replacement of<br>the ascending<br>aorta (age 14) |
| Connective tissue anomalies |                                                                                             |                             |                                |                                                                     |                                                   |                    |                    | Splenic rupture                                                                | Inguinal hernia<br>surgery                              | Varicose<br>veins                                     | Inguinal hernia<br>surgery (age 3)                  | Tall stature                              | Joint hyper-<br>mobility                             | Bilateral<br>inguinal<br>hernia | Increased skin<br>elasticity              | Tall stature                                                  |
|                             |                                                                                             |                             |                                |                                                                     |                                                   |                    |                    | Spontaneous<br>pneumo-thorax                                                   |                                                         | Cataract                                              | Rupture of<br>supraspinatus<br>ligament (age<br>41) | Narrow palate                             | Arachno-<br>dactyly                                  | Tall<br>stature                 | Beighton score of<br>4/9                  |                                                               |
|                             |                                                                                             |                             |                                |                                                                     |                                                   |                    |                    | Varicose veins                                                                 |                                                         | Ischemic<br>heart<br>disease                          | Tibialis<br>posterior<br>neuralgia (age<br>42)      | Pes planus                                | Pes planus                                           | Joint<br>hyper-<br>mobility     | Enlarged<br>armspan                       |                                                               |
|                             |                                                                                             |                             |                                |                                                                     |                                                   |                    |                    |                                                                                |                                                         | Contra-<br>lateral and<br>incar-<br>cerated<br>hernia |                                                     | Inguinal<br>hernia<br>surgery (age<br>40) | Shoulder<br>dislocations<br>and ankle<br>distortions |                                 | Recurrent joint<br>dislocation            |                                                               |

Table S2: ACMG classification and pathogenicity predictions of *LOX* variants

|                     | Gnomad | CADD | REVEL | MetaLR | PolyPhen2         | Mutation-Taster | ACMG classification                         |
|---------------------|--------|------|-------|--------|-------------------|-----------------|---------------------------------------------|
| p.(Leu18Profs*111)  | Absent | -    | -     | -      | -                 | Disease causing | <b>Pathogenic</b> (PVS1; PM2; PS3; PP4)     |
| p.(Arg118Glyfs*119) | Absent | -    | -     | -      | -                 | Disease causing | <b>Pathogenic</b> (PVS1, PS3, PM2)          |
| p.(Gly149*)         | Absent | 34   | -     | -      | -                 | Disease causing | <b>Pathogenic</b> (PVS1, PS3, PM2)          |
| p.(Met298Arg)       | Absent | 32   | 0,736 | 0,313  | Probably damaging | Disease causing | <b>Pathogenic</b> (PP3; PM1; PM2; PS1; PS3) |
| p.(Leu306Pro)       | Absent | 31   | 0,811 | 0,358  | Probably damaging | Disease causing | <b>VUS</b> (PM1; PM2; PP3)                  |



Table S3 part 2: Clinical features overview LOX patients literature (Guo et al., Lee et al., Cirnu et al., Renner et al.)

|                             | Guo et al<br>TAA-9544 p.(Gln267Pro) |                     | Lee et al p.(Met289Arg)                    |                      |                     |                                 |                               | Cirnu et al p.(Cys291Ser)                                                      |                                            |                     |                             | Renner et al<br>p.(Trp42*)              | Renner et al<br>p.(Tyr332Cys)                  |
|-----------------------------|-------------------------------------|---------------------|--------------------------------------------|----------------------|---------------------|---------------------------------|-------------------------------|--------------------------------------------------------------------------------|--------------------------------------------|---------------------|-----------------------------|-----------------------------------------|------------------------------------------------|
| Individual                  | IV:1                                | I:1                 | III:1                                      | II:1                 | II:3                | III:3                           | III:4                         | II-1                                                                           | II-2                                       | II-3                | I-2                         | Subject 188                             | Subject 13                                     |
| Gender                      | M                                   | M                   | M                                          | F                    | F                   | M                               | M                             | M                                                                              | M                                          | F                   | F                           | /                                       | M                                              |
| Age (years)                 | 14                                  | 54                  | 35                                         | 61                   | 73                  | 46                              | 41                            | 53                                                                             | 36                                         | 37                  | 74                          | 23                                      | 48                                             |
| Arterial anomalies          | Aortic root enlargement             | TAA surgery         | Ascending aortic aneurysm (105mm - age 19) | TAA surgery (age 52) | TAA surgery         | Aortic arch dissection (age 41) | Infrarenal abdominal aneurysm | Ascending aortic aneurysm and dissection (age 29)                              | Aortic aneurysm and rupture (sudden death) | Cerebral hemorrhage | Bowel infarction and stroke | Aortic aneurysm and dissection (type A) | Aortic aneurysm (ascending aortic replacement) |
|                             |                                     |                     |                                            |                      | Arterial tortuosity | Hepatic arterial aneurysm       |                               | Infrarenal abdominal aneurysm                                                  |                                            |                     |                             |                                         |                                                |
|                             |                                     |                     |                                            |                      |                     |                                 |                               | Aortic arch aneurysm (age 46)                                                  |                                            |                     |                             |                                         |                                                |
|                             |                                     |                     |                                            |                      |                     |                                 |                               | Aneurysms of A. iliaca communis, A. femoralis, A poplitea, A tibialis anterior |                                            |                     |                             |                                         |                                                |
|                             |                                     |                     |                                            |                      |                     |                                 |                               | Coronary aneurysm                                                              |                                            |                     |                             |                                         |                                                |
| Connective tissue anomalies | Dural ectasia                       | Dural ectasia       | Pectus excavatum                           |                      | Pectus excavatum    | Abdominal hernia (age 43)       |                               | Mild scoliosis                                                                 |                                            |                     |                             |                                         | Translucent skin                               |
|                             | Pectus deformity                    | Pectus deformity    | Tall stature                               |                      | Tall stature        | Myopia                          |                               | Tall stature                                                                   |                                            |                     |                             |                                         | Easy bruising                                  |
|                             | Joint hypermobility                 | Joint hypermobility | High arched palate                         |                      | High arched palate  |                                 |                               | High arched palate                                                             |                                            |                     |                             |                                         | Hernia                                         |
|                             | Skin striae                         | Skin striae         | Skin striae                                |                      | Varicose veins      |                                 |                               | Ascending aortic aneurysm and dissection (age 29)                              |                                            |                     |                             |                                         | Recurrent injuries of ankle ligaments          |
|                             | Dural ectasia                       | Dural ectasia       | Venous varicosities                        |                      | Skin striae         |                                 |                               |                                                                                |                                            |                     |                             |                                         |                                                |

**Table S4: Genes included in TAAD gene panel**

| Gene                     | Reference transcript (Ensembl) | Alternative exon | Reference transcript for alternative exon (Ensembl) |
|--------------------------|--------------------------------|------------------|-----------------------------------------------------|
| <i>ABL1</i>              | ENST00000372348                |                  |                                                     |
| <i>ACTA2</i>             | ENST00000458208                |                  |                                                     |
| <i>ARIH1</i>             | ENST00000379887                |                  |                                                     |
| <i>BGN</i>               | ENST00000331595                |                  |                                                     |
| <i>COL3A1</i>            | ENST00000304636                |                  |                                                     |
| <i>EFEMP2/FBLN4</i>      | ENST00000307998                |                  |                                                     |
| <i>ELN</i>               | ENST00000358929                |                  |                                                     |
| <i>EMILIN1</i>           | ENST00000380320                |                  |                                                     |
| <i>FBN1</i>              | ENST00000316623                |                  |                                                     |
| <i>FBN2</i>              | ENST00000262464                |                  |                                                     |
| <i>FLNA</i>              | ENST00000369850                |                  |                                                     |
| <i>FOXE3<sup>a</sup></i> | ENST00000335071                |                  |                                                     |
| <i>HCN4</i>              | ENST00000261917                |                  |                                                     |
| <i>LMOD1</i>             | ENST00000367288                |                  |                                                     |
| <i>LOX</i>               | ENST00000231004                |                  |                                                     |
| <i>LTBP3</i>             | ENST00000301873                |                  |                                                     |
| <i>MAT2A</i>             | ENST00000306434                |                  |                                                     |
| <i>MFAP5</i>             | ENST00000359478                |                  |                                                     |
| <i>MYH11</i>             | ENST00000452625                | Exon 42B         | ENST00000396324                                     |
| <i>MYLK</i>              | ENST00000360304                |                  |                                                     |
| <i>NOTCH1</i>            | ENST00000277541                |                  |                                                     |
| <i>PLOD1</i>             | ENST00000196061                | Exon 2A          | ENST00000449038                                     |
| <i>PMEPA1/TMEPAI</i>     | ENST00000341744                |                  |                                                     |
| <i>PRKG1<sup>b</sup></i> | ENST00000401604                |                  |                                                     |
| <i>SKI</i>               | ENST00000378536                |                  |                                                     |
| <i>SLC2A10</i>           | ENST00000359271                |                  |                                                     |
| <i>SMAD2</i>             | ENST00000402690                |                  |                                                     |
| <i>SMAD3</i>             | ENST00000327367                | Exon 1A          | ENST00000439724                                     |
| <i>SMAD4</i>             | ENST00000342988                |                  |                                                     |
| <i>SMAD6</i>             | ENST00000288840                |                  |                                                     |
| <i>TGFB2</i>             | ENST00000366929                |                  |                                                     |
| <i>TGFB3</i>             | ENST00000238682                |                  |                                                     |
| <i>TGFBR1</i>            | ENST00000374994                |                  |                                                     |
| <i>TGFBR2</i>            | ENST00000359013                |                  |                                                     |

<sup>a</sup>Only Forkhead domein

<sup>b</sup>Only exon 3
